# Supplementary material for: Chronic immune barrier dysregulation among women with a history of violence victimization
Source: JCI journal article supplement (doi:10.1172/jci.insight.126097), 2019-05-15
Supplement: sd1 [file 1]

## Supplemental data

### Supplemental Figure 1

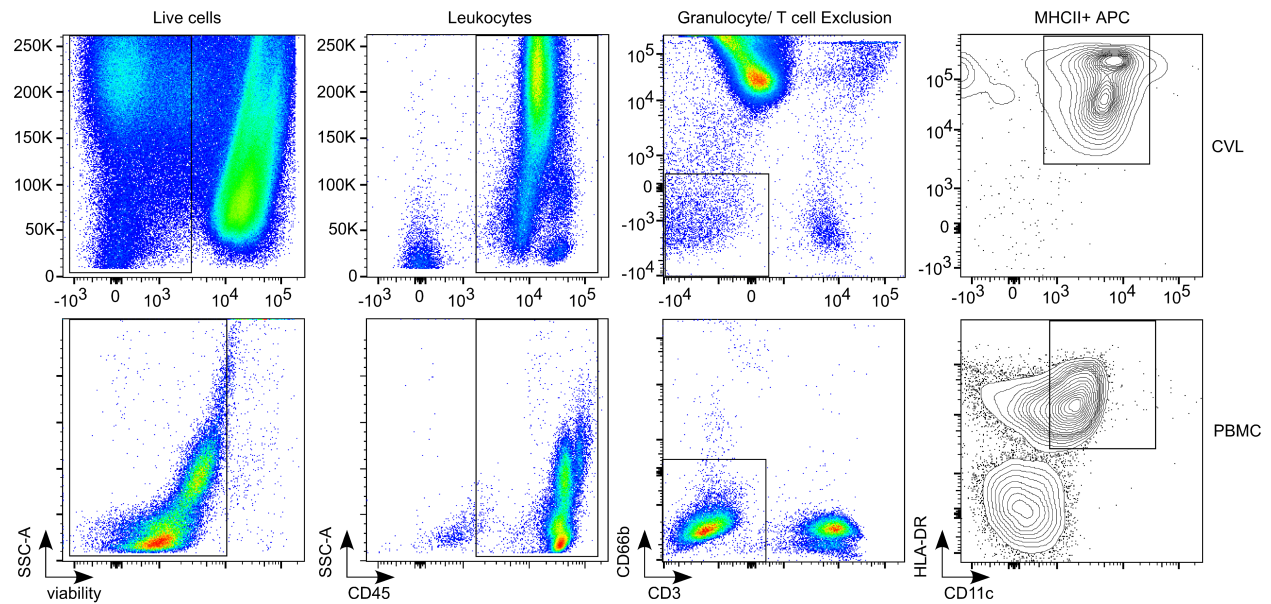

**Supplemental Figure 1:** Representative gating strategy for measurement of MHC Class II<sup>+</sup> APC from vaginal lavage samples (top) compared to matched-PBMC (bottom). Single cells are gated for viability, CD45 expression (identify pan-leukocytes), and granulocyte/T cell exclusion. Remaining cell populations are measured for CD11c and HLA-DR (MHC class II) expression.

## Supplemental Figure 2

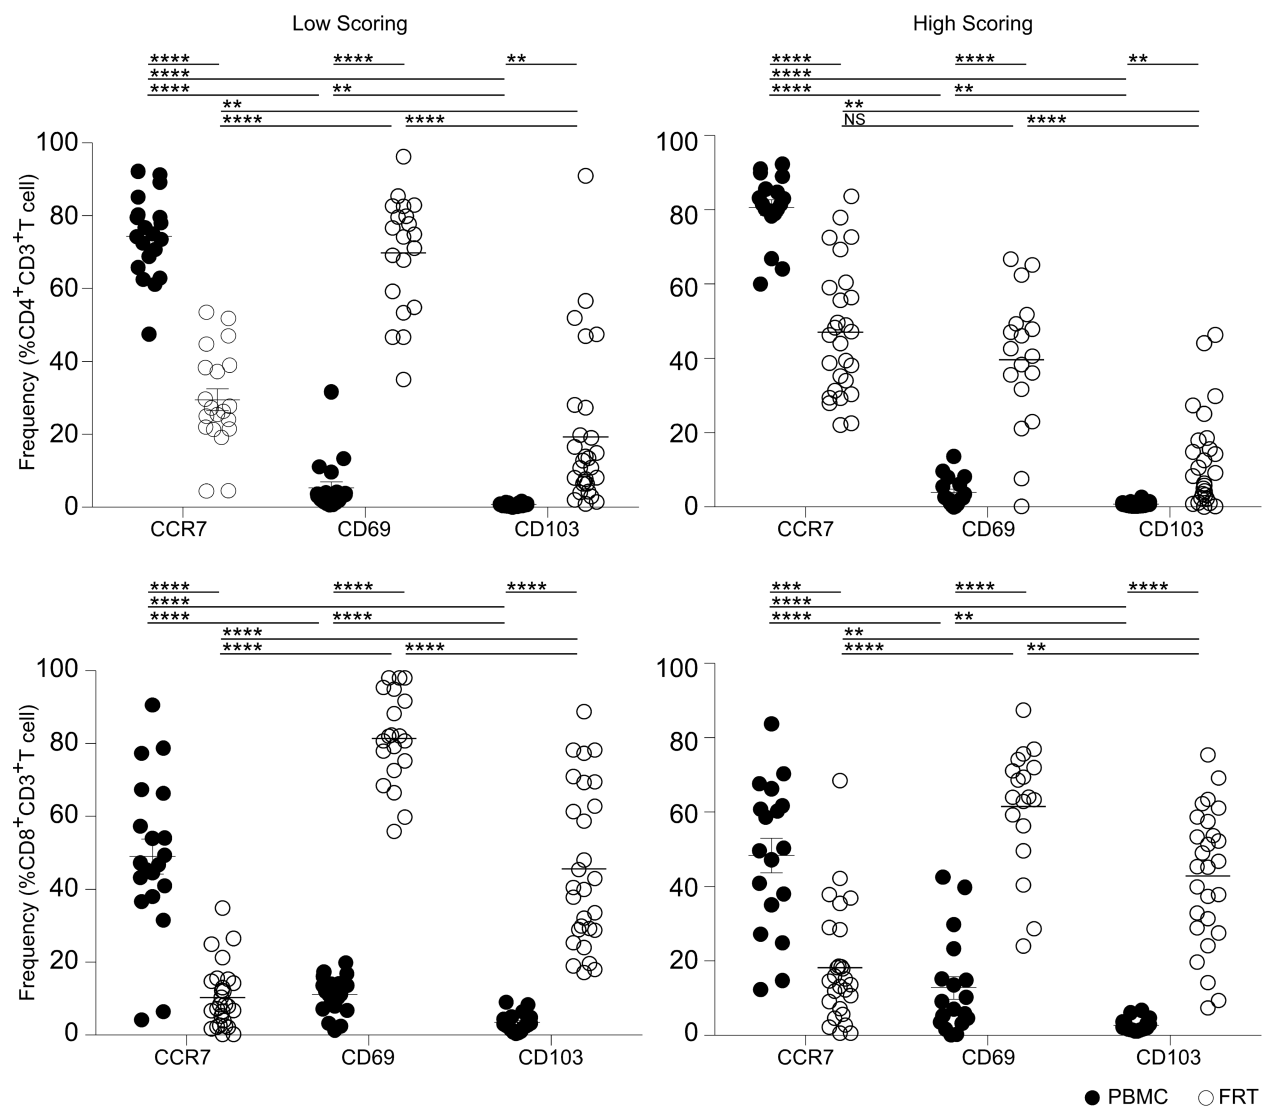

**Supplemental Figure 2:** Extracellular expression frequency of CCR7, CD69, and CD103 from CD4 (top panel) or CD8 (bottom panel) T cell populations (n=54) collected from participant PBMC (black circles) or matched-vaginal lavage (white circles, labeled FRT). Statistics calculated by a paired two-tailed t-test.

### Supplemental Figure 3

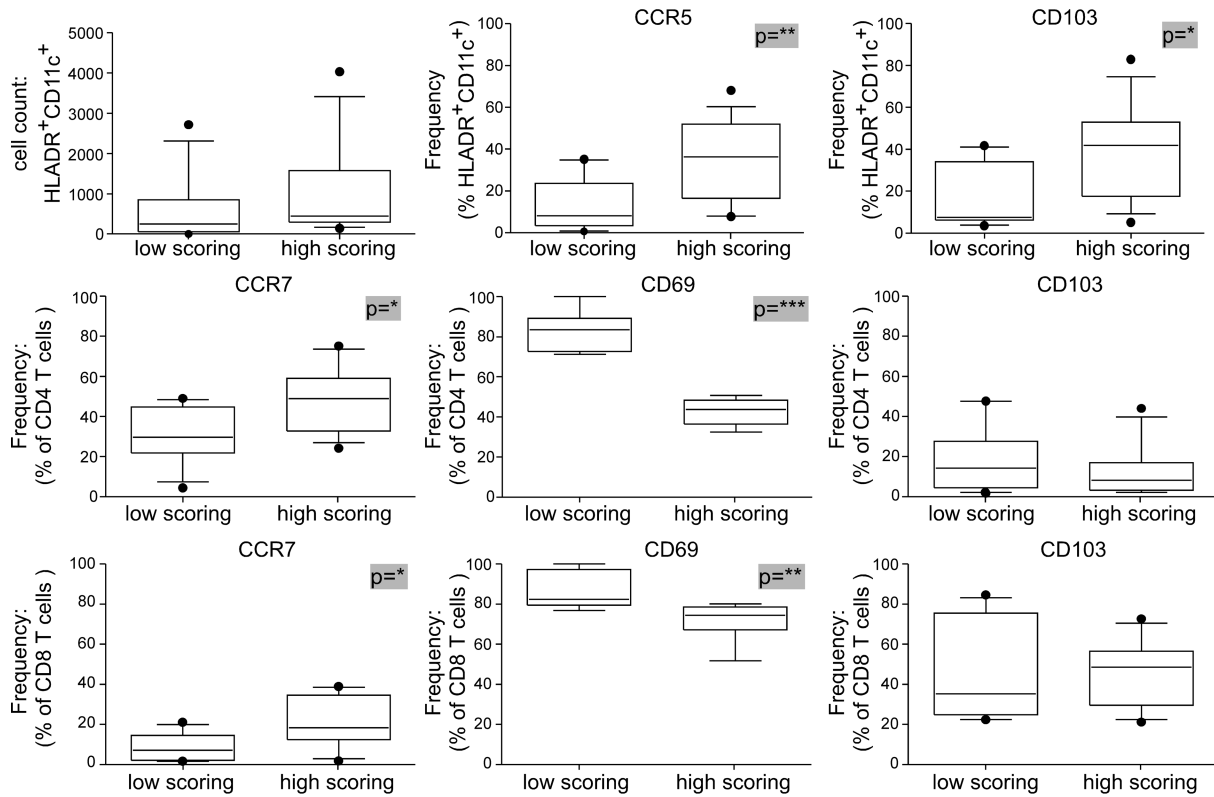

**Supplemental Figure 3:** FRT cell barrier measurements from high or low-scoring LTVH participant samples that are bacterial vaginosis-negative (n=34). Samples with Nugent scores indeterminate were also excluded. Statistics calculated by an unpaired Students two-tailed t-test.

**Supplemental Figure 4**

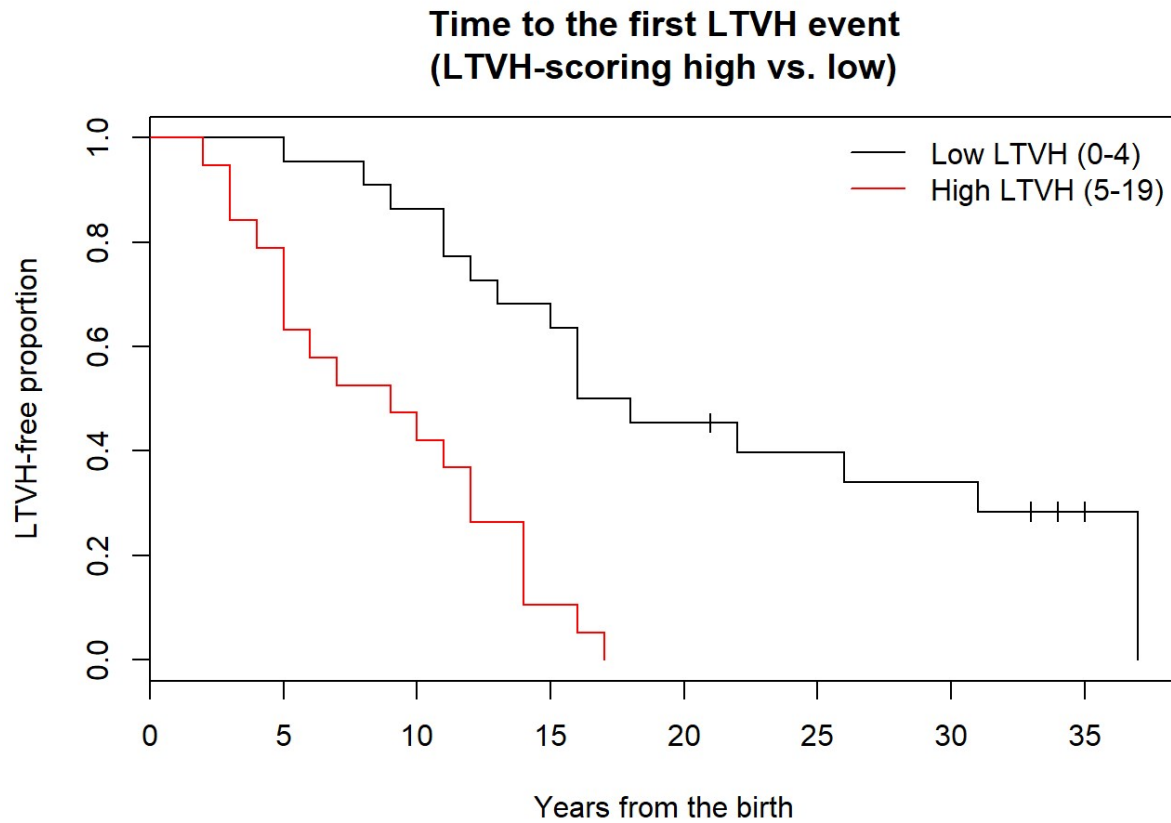

**Supplemental Figure 4:** Time to first LTVH event stratified by LTVH. High-scoring LTVH (red line) are compared to low-scoring LTVH (black line) groups. Participants who have never experienced LTVH are treated as right-censored data at their age at study enrollment. Statistics calculated by log rank test ( $p < 0.0001$ ).

## **Supplemental Table legends**

**Supplemental Table 1:** Prevalence of LTVH in cohort (n=41). Prevalence of LTVH by cohort grouping followed by age of occurrence (% and range), perceived danger, feelings of fear, helplessness, or horror, and whether the trauma was repeated (shown as % of overall prevalence).

**Supplemental Table 2:** Age of the first LTVH, and proportion of early onset in the high- and low-scoring LTVH groups. Statistical analysis <sup>a</sup>Wilcoxon rank sum test with *t*-approximation, <sup>b</sup>Log rank test, and <sup>c</sup>Pearson's chi-squared test with Yate's correction for continuity as indicated.

**Supplemental Table 3:** Demographics and prevalence of bacterial vaginosis in the early- and late-onset groups. Statistical analysis <sup>a</sup>Wilcoxon rank sum test with *t*-approximation and <sup>b</sup>Pearson's chi-squared test with Yate's correction for continuity as indicated.

**Supplemental Table 4:** Comparison of mixed-effect linear regression models with and without LTVH age-onset. AICc (Akaike information criterion with correction for small sample size) was applied to correct for smaller sample size in the age-onset group. Immune parameters used for modeling based on specific changes detected by comparing age-onset grouping (data not shown).

**Supplemental Table 1: Prevalence of distinct LTVH events in study cohort**

|                                          | Low LTVH<br>prevalence<br>(%) | High<br>LTVH<br>prevalence<br>(%) | Overall<br>prevalence<br>(%) | Age of<br>occurrence<br>(average,<br>range) | Danger<br>of death<br>(%) | Fear,<br>helplessness,<br>or horror<br>(%) | Repeated<br>(>1<br>event)<br>(%) |
|------------------------------------------|-------------------------------|-----------------------------------|------------------------------|---------------------------------------------|---------------------------|--------------------------------------------|----------------------------------|
| Natural disaster                         | 9.09                          | 50                                | 21.6                         | 18.3, 10-38                                 | 30                        | 60                                         | 40                               |
| Human-made disasters                     | 18.18                         | 36.8                              | 28.6                         | 24.4, 12-44                                 | 67                        | 83                                         | 50                               |
| Direct combat experience                 | 0                             | 5.2                               | 4.76                         | NR                                          | NR                        | NR                                         | NR                               |
| Lived in war zone                        | 0                             | 0                                 | 0                            | NA                                          | NA                        | NA                                         | NA                               |
| Serious accident                         | 0                             | 10.5                              | 7.14                         | 21.7, 16-27                                 | 33                        | 33                                         | 33                               |
| Exposed to dangerous<br>chemicals        | 0                             | 0                                 | 0                            | NA                                          | NA                        | NA                                         | NA                               |
| Physically harmed                        | 9.09                          | 84.2                              | 45.24                        | 14.8, 2-29                                  | 47                        | 74                                         | 58                               |
| Threatened with a weapon                 | 4.5                           | 67                                | 33                           | 19.2, 14-38                                 | 71                        | 71                                         | 43                               |
| Threatened face-to-face                  | 4.5                           | 73.68                             | 38.09                        | 20.5, 6-36                                  | 50                        | 69                                         | 44                               |
| Assaulted with weapon                    | 0                             | 31.57                             | 14.28                        | 25.5, 16-38                                 | 67                        | 83                                         | 67                               |
| Physically harmed as child               | 9.09                          | 42.1                              | 23.8                         | 7.8, 4-15                                   | 20                        | 90                                         | 60                               |
| Physically abused as child               | 9.09                          | 26.31                             | 16.67                        | 7.9, 4-14                                   | 57                        | 100                                        | 29                               |
| Coerced into unwanted<br>sex             | 9.09                          | 52.6                              | 28.57                        | 16.3, 3-41                                  | 66                        | 83                                         | 30                               |
| Attempted forced sex                     | 0                             | 52.6                              | 28.57                        | 14.6, 6-32                                  | 30                        | 75                                         | 30                               |
| Private parts touched                    | 9.09                          | 36.8                              | 23.8                         | 11.7, 4-20                                  | 30                        | 80                                         | 80                               |
| Family/friend murdered                   | 4.5                           | 31.57                             | 21.4                         | 24.8, 9-44                                  | 10                        | 78                                         | 33                               |
| Seen murder or serious<br>injury         | 9.09                          | 26.3                              | 21.4                         | 13.8, 5-30                                  | 10                        | 67                                         | 30                               |
| Family/friend committed<br>suicide       | 9.09                          | 31.57                             | 19.04                        | 18.6, 14-33                                 | 0                         | 38                                         | 50                               |
| Seen dead body                           | 13.6                          | 31.57                             | 23.8                         | 15.4, 5-26                                  | 20                        | 60                                         | 40                               |
| Seen another person<br>physically harmed | 4.5                           | 68.4                              | 38.09                        | 15, 3-36                                    | 40                        | 75                                         | 63                               |
| Seen another person<br>sexually attacked | 0                             | 10.5                              | 4.76                         | 9, 4-14                                     | 50                        | 50                                         | 50                               |
| Property damaged                         | 4.5                           | 68.4                              | 38.09                        | 23.1, 15-35                                 | 13                        | 50                                         | 38                               |
| Something stolen with<br>force (mugging) | 0                             | 15.78                             | 7.14                         | 24, 19-35                                   | 67                        | 67                                         | 30                               |
| Attempt to steal with force              | 0                             | 10.5                              | 7.14                         | 27.3, 24-31                                 | 0                         | 30                                         | 0                                |
| Break-in (not present)                   | 0                             | 42.1                              | 23.8                         | 23.6, 10-30                                 | 20                        | 90                                         | 50                               |
| Break-in (present)                       | 4.5                           | 36.84                             | 19.04                        | 22.8, 10-30                                 | 63                        | 88                                         | 38                               |
| Something stolen without<br>force        | 4.5                           | 57.89                             | 30.9                         | 27, 12-40                                   | NA                        | 38                                         | 23                               |
| Kidnapped                                | 0                             | 15.78                             | 7.14                         | 22.3, 19-26                                 | 100                       | 100                                        | 0                                |
| Stalked                                  | 0                             | 26.3                              | 16.7                         | 23.2, 20-28                                 | 42                        | 71                                         | 14.2                             |
| Other dangerous situation                | 0                             | 10.5                              | 4.76                         | 28, 19-37                                   | NA                        | NA                                         | 50                               |

**Supplemental Table 2: Age of the first lifetime victimization and trauma (LTVH), and proportion of early onset in the high- and low-scoring groups.**

|                                         | Total<br>(n = 41) | Group                   |                          | p                    |
|-----------------------------------------|-------------------|-------------------------|--------------------------|----------------------|
|                                         |                   | Low-scoring<br>(n = 22) | High-scoring<br>(n = 19) |                      |
| Median number of LTVH events<br>(range) | 4                 | 1 (0 – 4)               | 9 (5 – 19)               |                      |
| Median age                              | 32                | 31                      | 34                       | 0.134 <sup>a</sup>   |
| Median age of the first LTVH            | 13                | 17                      | 9                        | <0.0001 <sup>b</sup> |
| Early onset of LTVH <sup>†</sup> (%)    | 57.1              | 37.5                    | 73.7                     | 0.07 <sup>c</sup>    |

<sup>a</sup>Wilcoxon rank sum test with *t*-approximation

<sup>b</sup>Log-rank test

<sup>c</sup>Pearson's chi-squared test with Yate's correction for continuity

<sup>†</sup>Participants with no LTVH (censored data) are excluded.

**Supplemental Table 3: Demographics and prevalence of bacterial vaginosis in the early- and late-onset LTVH groups.**

|                                          | No LTVH<br>(n = 6) | Early-onset<br>(n = 20) | Late-onset<br>(n = 15) | p <sup>†</sup>     |
|------------------------------------------|--------------------|-------------------------|------------------------|--------------------|
| Median age of the first LTVH (range)     | --                 | 7.5 (2 – 12)            | 16 (13 – 37)           |                    |
| Median number of LTVH events (range)     | --                 | 8 (3 – 19)              | 1 (1 – 13)             | 0.003 <sup>a</sup> |
| Median age                               | 33.5               | 30.5                    | 32                     | 0.829 <sup>a</sup> |
| African American / Mixed race (%)        | 100                | 70                      | 73.3                   | 1.000 <sup>b</sup> |
| High-school education level or above (%) | 83.3               | 95                      | 66.7                   | 0.081 <sup>b</sup> |
| Annual income less than \$25,000 (%)     | 100                | 60                      | 80                     | 0.372 <sup>b</sup> |
| Prevalence of bacterial vaginosis (%)    | 83.3               | 65                      | 33.3                   | 0.130 <sup>b</sup> |
| Within African American (%)              | 83.3               | 71.4                    | 45.5                   | 0.366 <sup>b</sup> |

<sup>a</sup>Wilcoxon rank sum test with *t*-approximation

<sup>b</sup>Pearson's chi-squared test with Yate's correction for continuity

<sup>†</sup>Participants with no LTVH (censored data) are excluded.



**Supplemental Table 4: Comparison of the mixed-effect linear models with and without the LTVH onset after controlling the effect of BV score and phase of menstrual cycle.**

|                        | AIC   | High LTVH score | p      | Early LTVH onset | p    |
|------------------------|-------|-----------------|--------|------------------|------|
| <i>CD69+CD4 T cell</i> |       |                 |        |                  |      |
| Model without onset    | 193.3 | -33.1           | 0.0006 |                  |      |
| Model with onset       | 186.1 | -27.9           | 0.0048 | 8.6              | 0.24 |
| <i>CD69+CD8 T cell</i> |       |                 |        |                  |      |
| Model without onset    | 198.5 | -18.6           | 0.017  |                  |      |
| Model with onset       | 193.8 | -14.1           | 0.11   | 7.1              | 0.39 |
